# Supplementary material
Source: MDPI journal article supplement (https://www.mdpi.com/2072-4292/12/14/2219)

percentage change (2005 value = 100)

— annual consumption  
— peak demand  
- - - nightlights

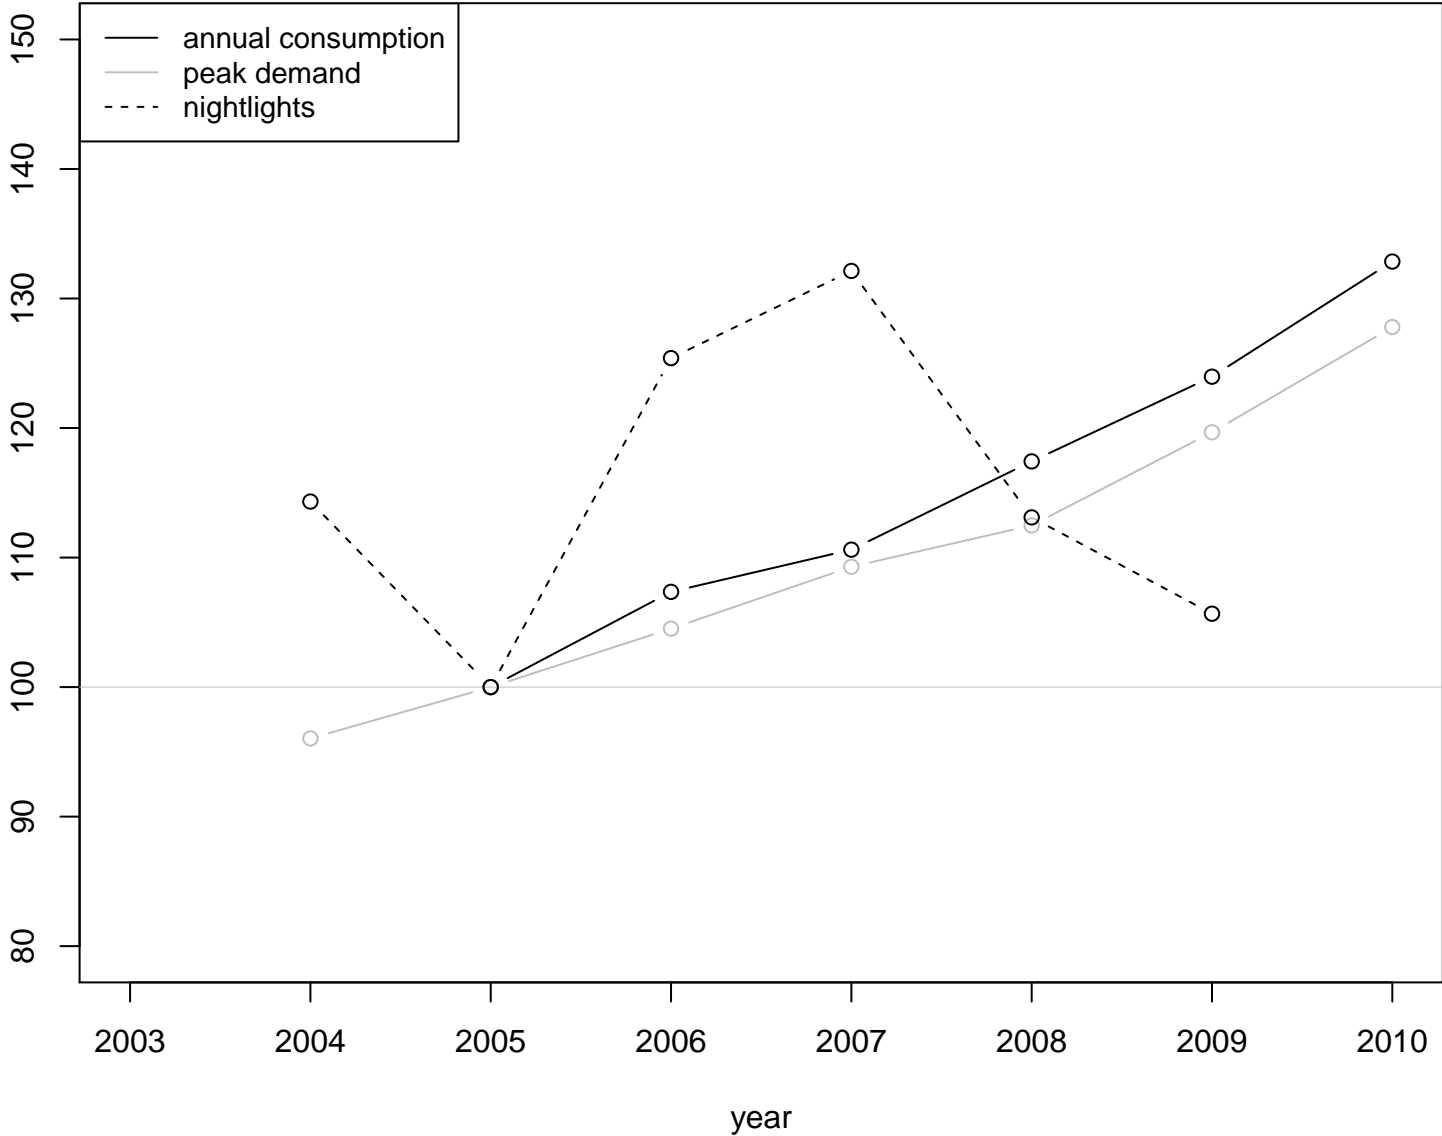

Supplement: s1 [file s1]
